# Supplementary material for: Coupling between tolerance and resistance for two related Eimeria parasite species
Source: PubMed Central journal article supplement (PMC7771152; doi:10.1002/ece3.6986), 2020-11-12
Supplement: ECE3-10-13938-s001.pdf [file ECE3-10-13938-s001.pdf]

| Batch     | Mouse strain (species) |            |                    |                       |                       |                  |             | <i>Eimeria</i> isolate (species) |                                         |
|-----------|------------------------|------------|--------------------|-----------------------|-----------------------|------------------|-------------|----------------------------------|-----------------------------------------|
|           | SCHUNT (Mmd)           | STRA (Mmd) | SCHUNTx STRA (Mmd) | STRAx BUSNA (Mmd-Mmm) | SCHUNTx PWD (Mmd-Mmm) | PWDx BUSNA (Mmd) | BUSNA (Mmm) |                                  | PWD (Mmm)                               |
| <b>B1</b> | 3                      | 4          |                    |                       |                       |                  | 2           | 3                                | Brandenburg64 ( <i>E. ferrisi</i> )     |
| <b>B2</b> | 4                      | 4          |                    |                       |                       |                  | 5           | 3                                | Brandenburg64 ( <i>E. ferrisi</i> )     |
| <b>B3</b> | 3                      | 3          | 2                  | 2                     | 3                     | 3                | 3           | 3                                | Brandenburg64 ( <i>E. ferrisi</i> )     |
|           | 3                      | 3          | 3                  | 4                     | 3                     | 3                | 3           | 3                                | Brandenburg88 ( <i>E. falciformis</i> ) |
| <b>B4</b> | 4                      | 4          | 4                  | 6                     | 5                     | 6                | 4           | 4                                | Brandenburg64 ( <i>E. ferrisi</i> )     |
|           | 3                      | 4          | 5                  | 4                     | 3                     | 4                | 4           | 4                                | Brandenburg88 ( <i>E. falciformis</i> ) |
