# Supplementary material for: Coupling between tolerance and resistance for two related Eimeria parasite species
Source: PubMed Central journal article supplement (PMC7771152; doi:10.1002/ece3.6986), 2020-11-12

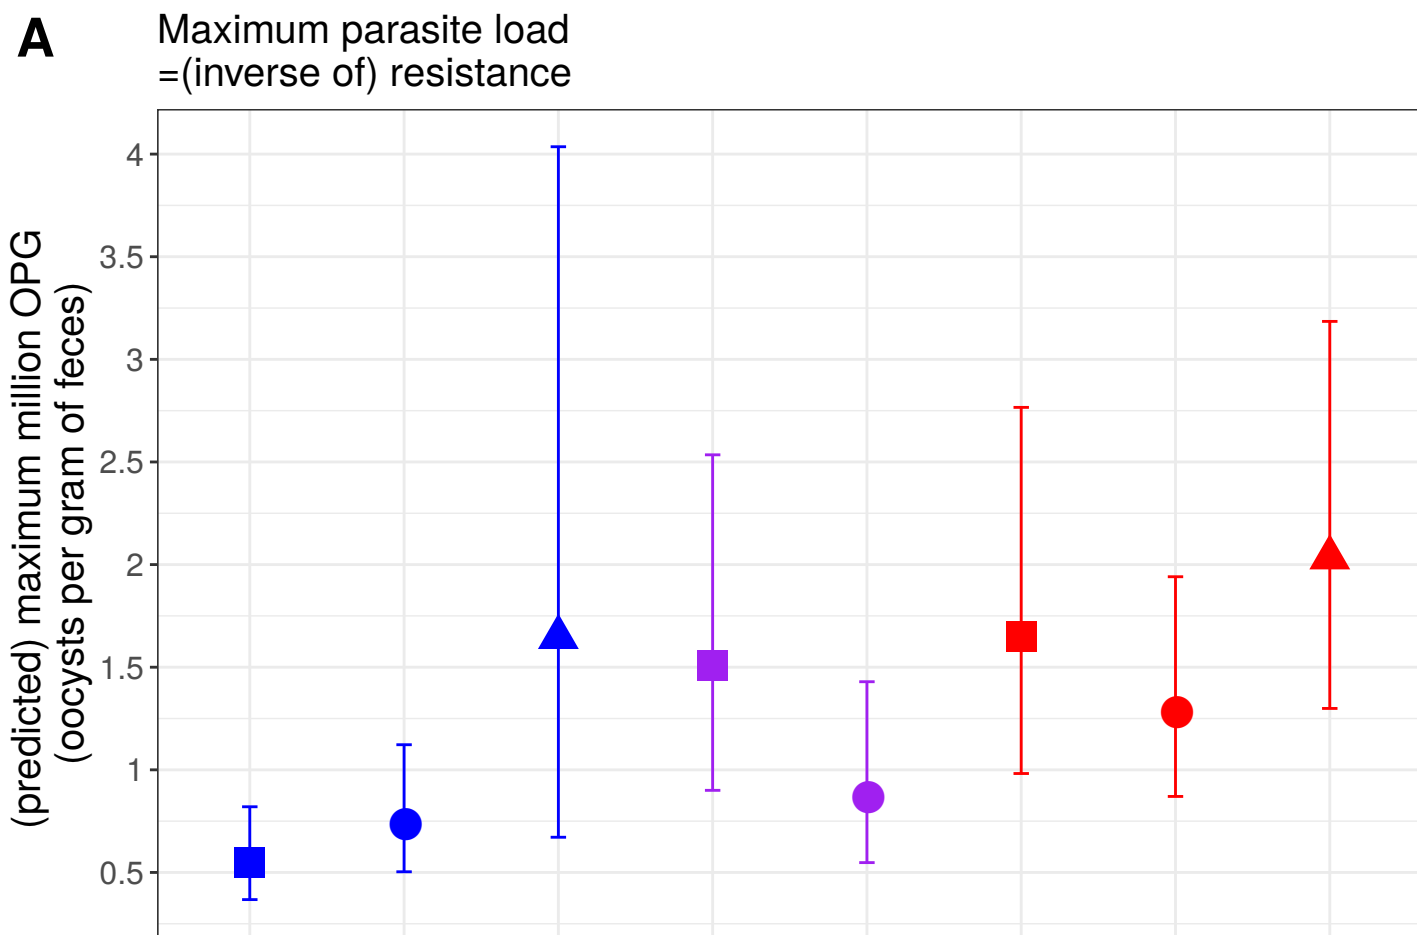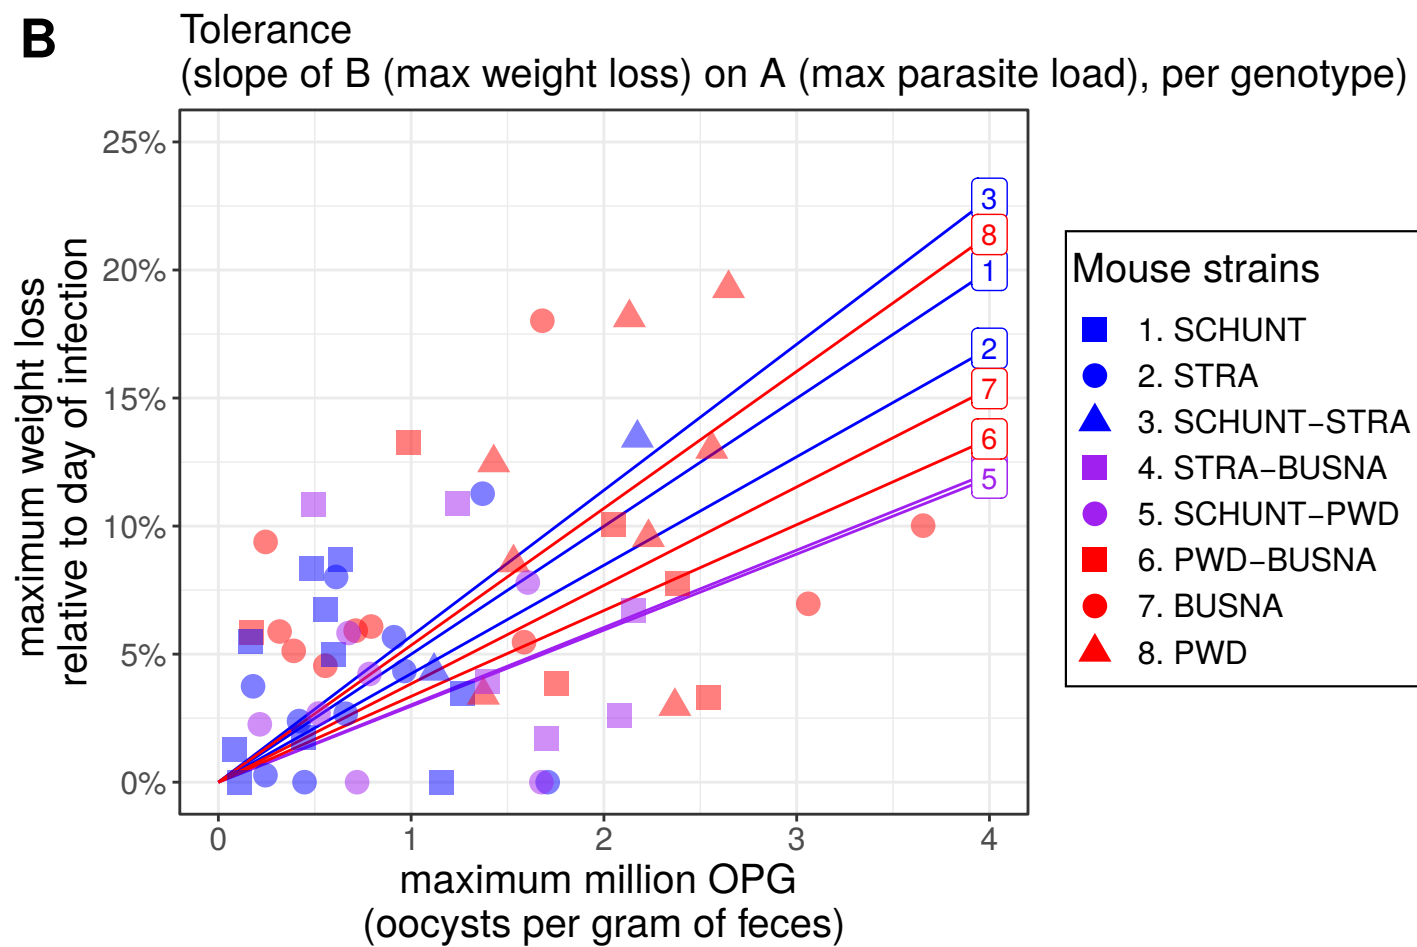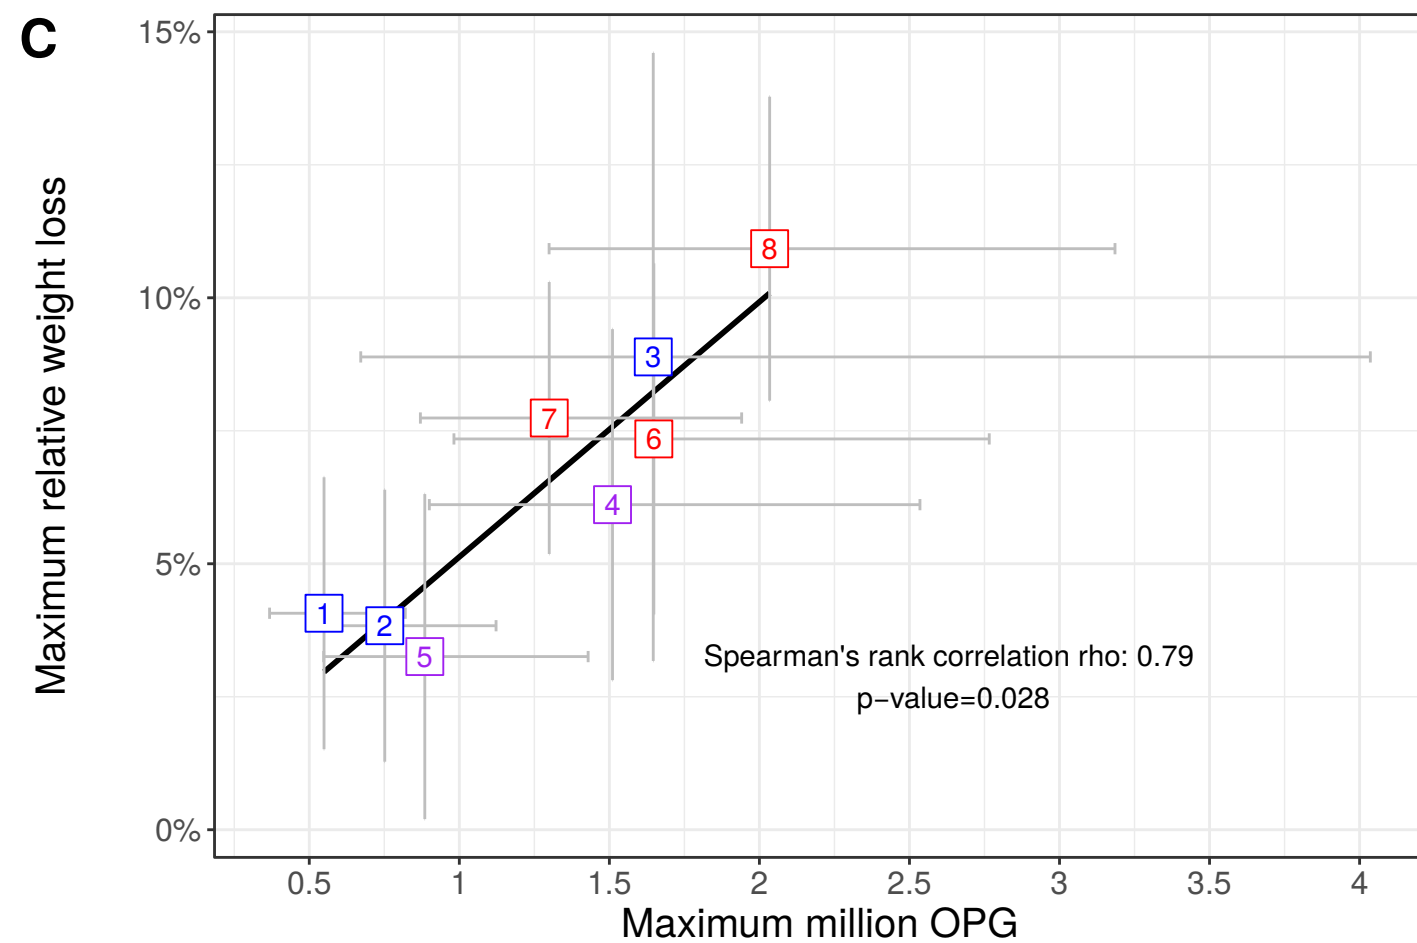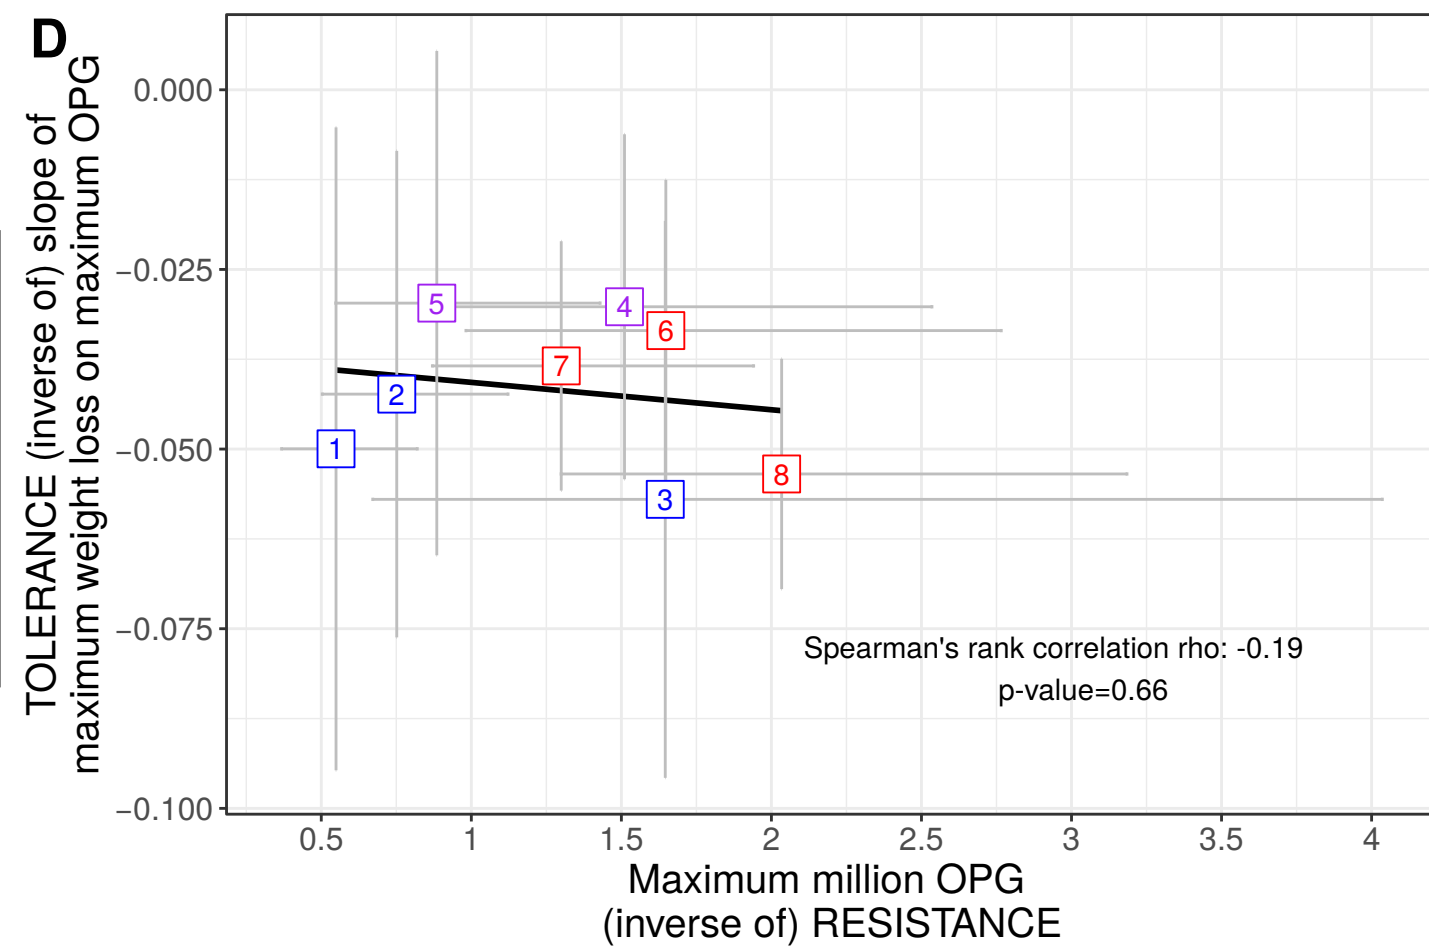

Supplement: ECE3-10-13938-s002.pdf [file ECE3-10-13938-s002.pdf]
